# Supplementary material for: Cytotoxicity and Apoptosis Induced by a Plumbagin Derivative in Estrogen Positive MCF-7 Breast Cancer Cells
Source: PubMed Central journal article supplement — Anticancer Agents Med Chem. 2014 Jan;14(1):170–80. doi: 10.2174/18715206113136660369 (PMC3894702; doi:10.2174/18715206113136660369), 2014-01
Supplement: ACAMC-14-170_SD1.pdf [file ACAMC-14-170_SD1.pdf]

## SUPPLEMENTARY MATERIAL

**Supplementary File 1. The Sequences of TaqMan Primers, Probes and ID's Gene Expression Assays Used for Real Time PCR Analysis in the Present Study**

| Target                | Sequence                             |
|-----------------------|--------------------------------------|
| p53 Forward Primer    | 5'-GCCCCCAGGGAGCACTA-3'              |
| p53 Reverse Primer    | 5'-GGGAGAGGAGCTGGTGTG-3'             |
| p53 Probe             | 5'-TTGGGCAGTGCTCGCT-3'               |
| Bax Forward primer    | 5'-TCCCCCGAGAGGTCTTT-3'              |
| Bax Reverse primer    | 5'-CGGCCCCAGTTGAAGTTG-3'             |
| Bax Probe             | 5'-TCAGAAAACATGTCAGCTGCCACTCGG-3'    |
| Mdm2 Forward primer   | 5'-TTACCCAGGCTGGAGTGCAG-3'           |
| Mdm2 Reverse primer   | 5'-GAGAATGGTGCGAACCCG-3'             |
| Mdm2 Probe            | 5'-TGGCTCACTGCAAGCTCTGCCCTC-3'       |
| Bcl2 Forward primer   | 5'-CATGTGTGTGGAGAGCGTCAA-3'          |
| Bcl2 Reverse primer   | 5'-GCCGGTTCAGGTAAGTCACTCA-3'         |
| Bcl2 Probe            | 5'-CCTGGTGGACAACATCGCCCTGT-3'        |
| NF-kB Forward Primer  | 5'-AGCACAGATACCACCAAGACCC-3'         |
| NF-k B Reverse Primer | 5'-CCAGGGAGATGCGCACTG-3'             |
| NF-k B Probe          | 5'-CATCAAGATCAATGGCTACACAGGACCAGG-3' |
| GAPDH Forward primer  | 5'-AGCCTCAAGATCATCAGCAATG-3'         |
| GAPDH Reverse primer  | 5'-ATGGACTGTGGTCATGAGTCCTT-3'        |
| GAPDH Probe           | 5'-CCAAGTCTTAGCACCCCTGGCC-3'         |
| Casp7 Taqman Assay    | ID: Hs00169152_m1                    |
| Bad Taqman Assay      | ID: Hs00188930_m1                    |

(a)

**BJ treated with PL and Derivatives 12 h**

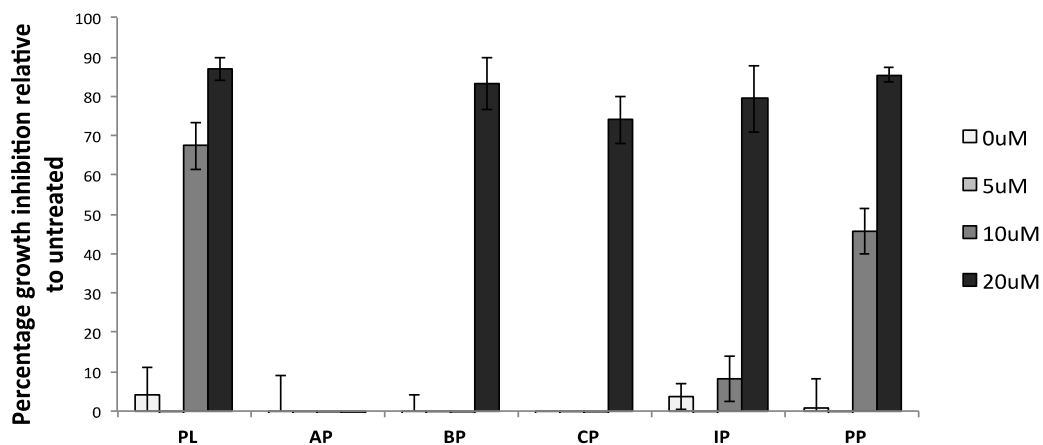

**BJ treated with PL and Derivatives 36 h**

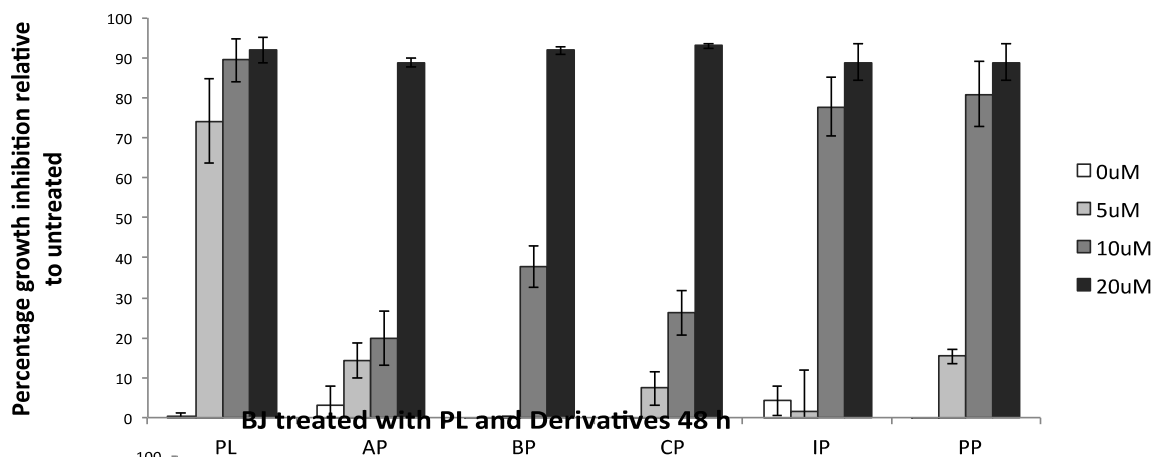

**BJ treated with PL and Derivatives 48 h**

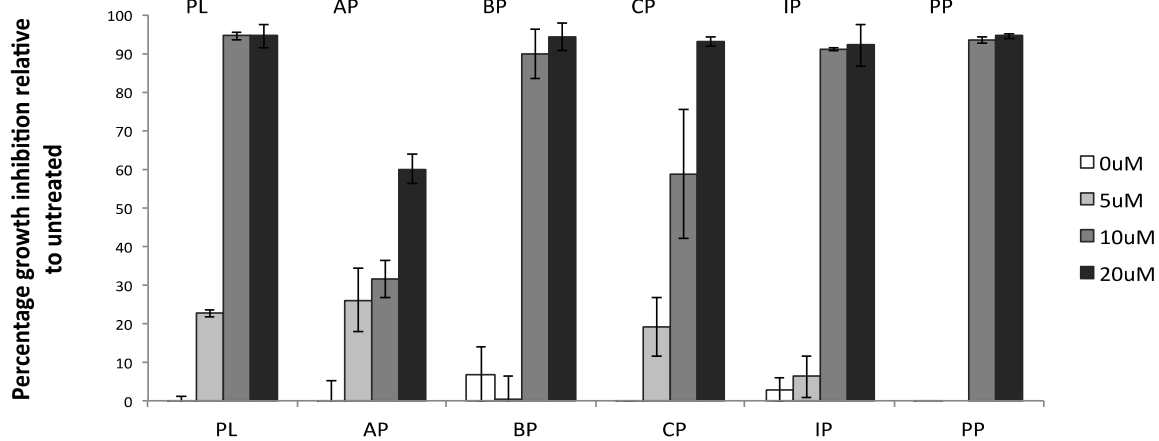

(b)

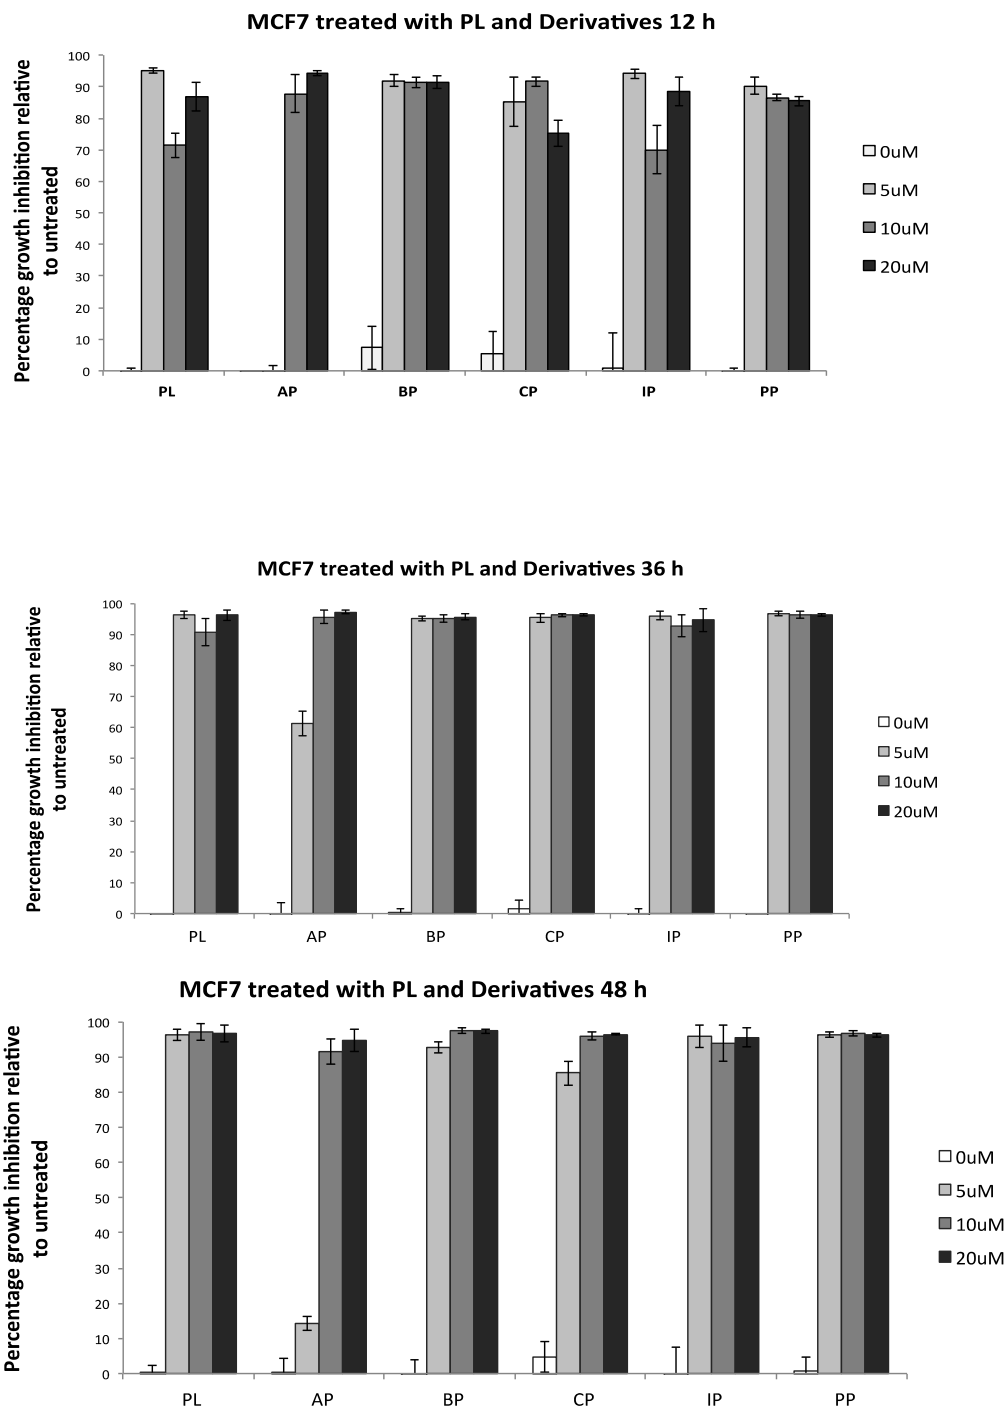

(c)

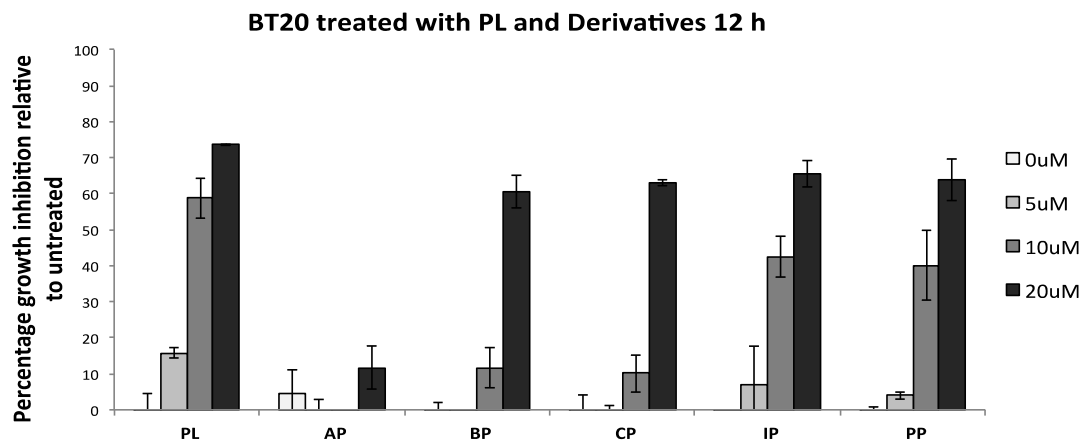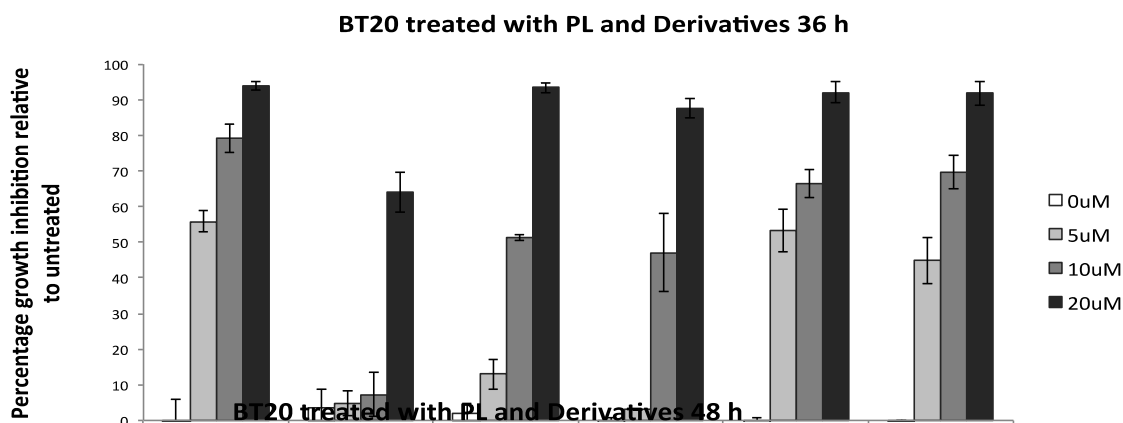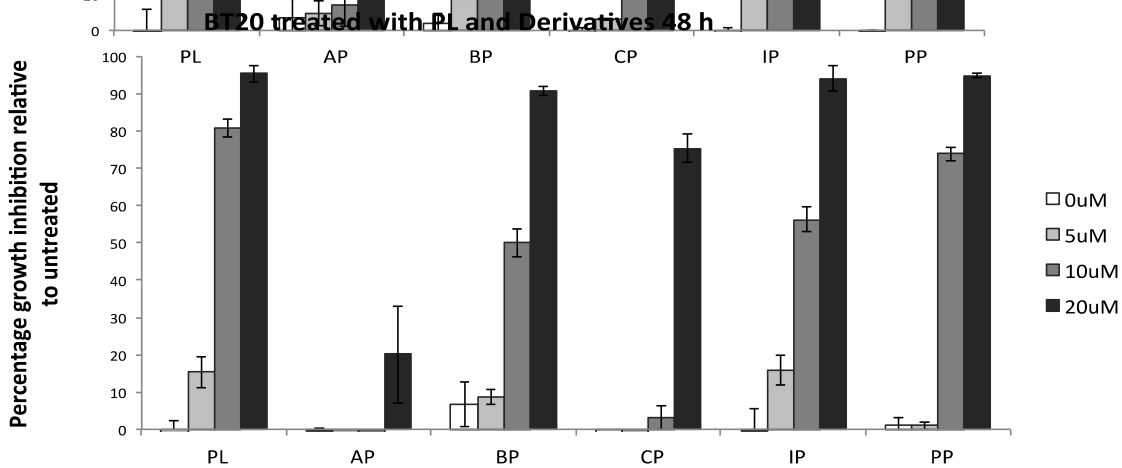

(d)

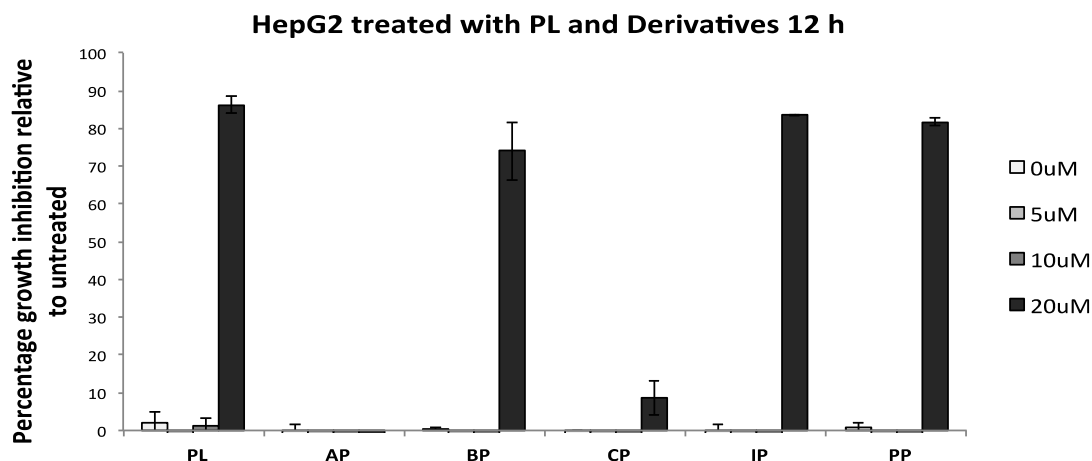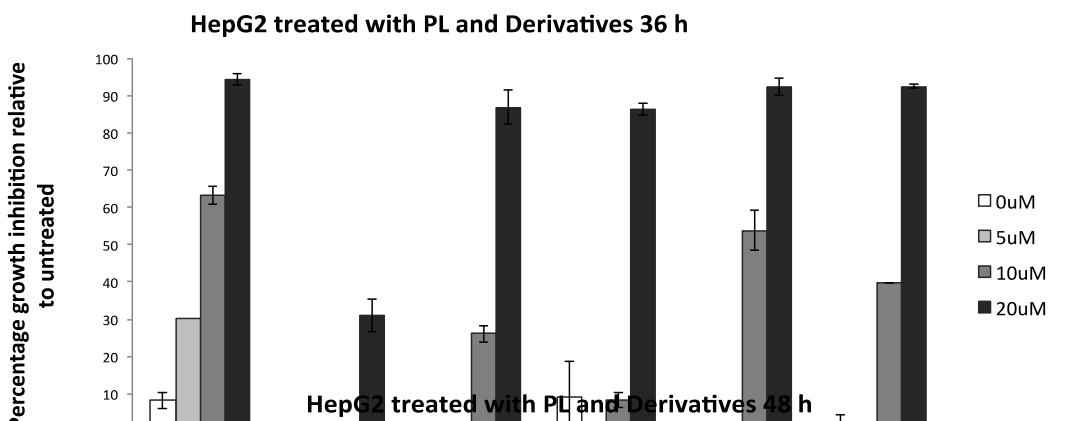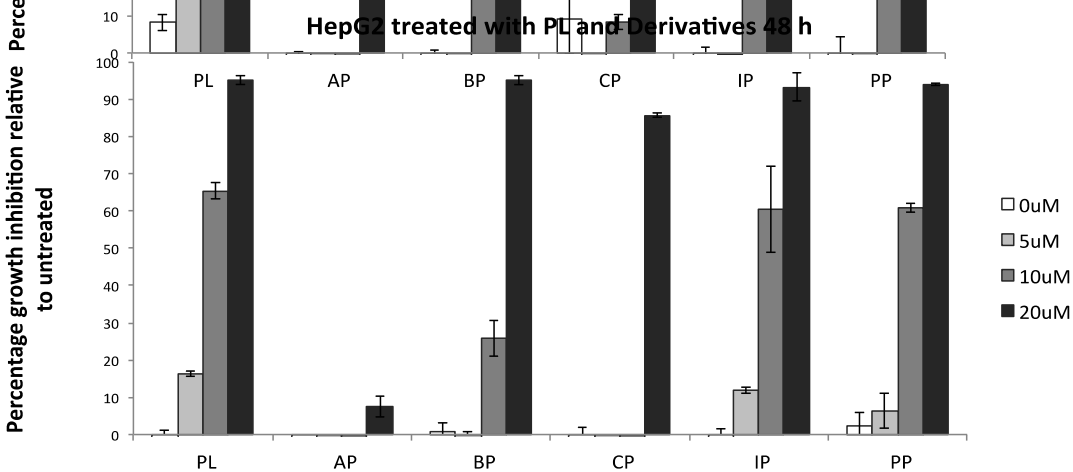

(e)

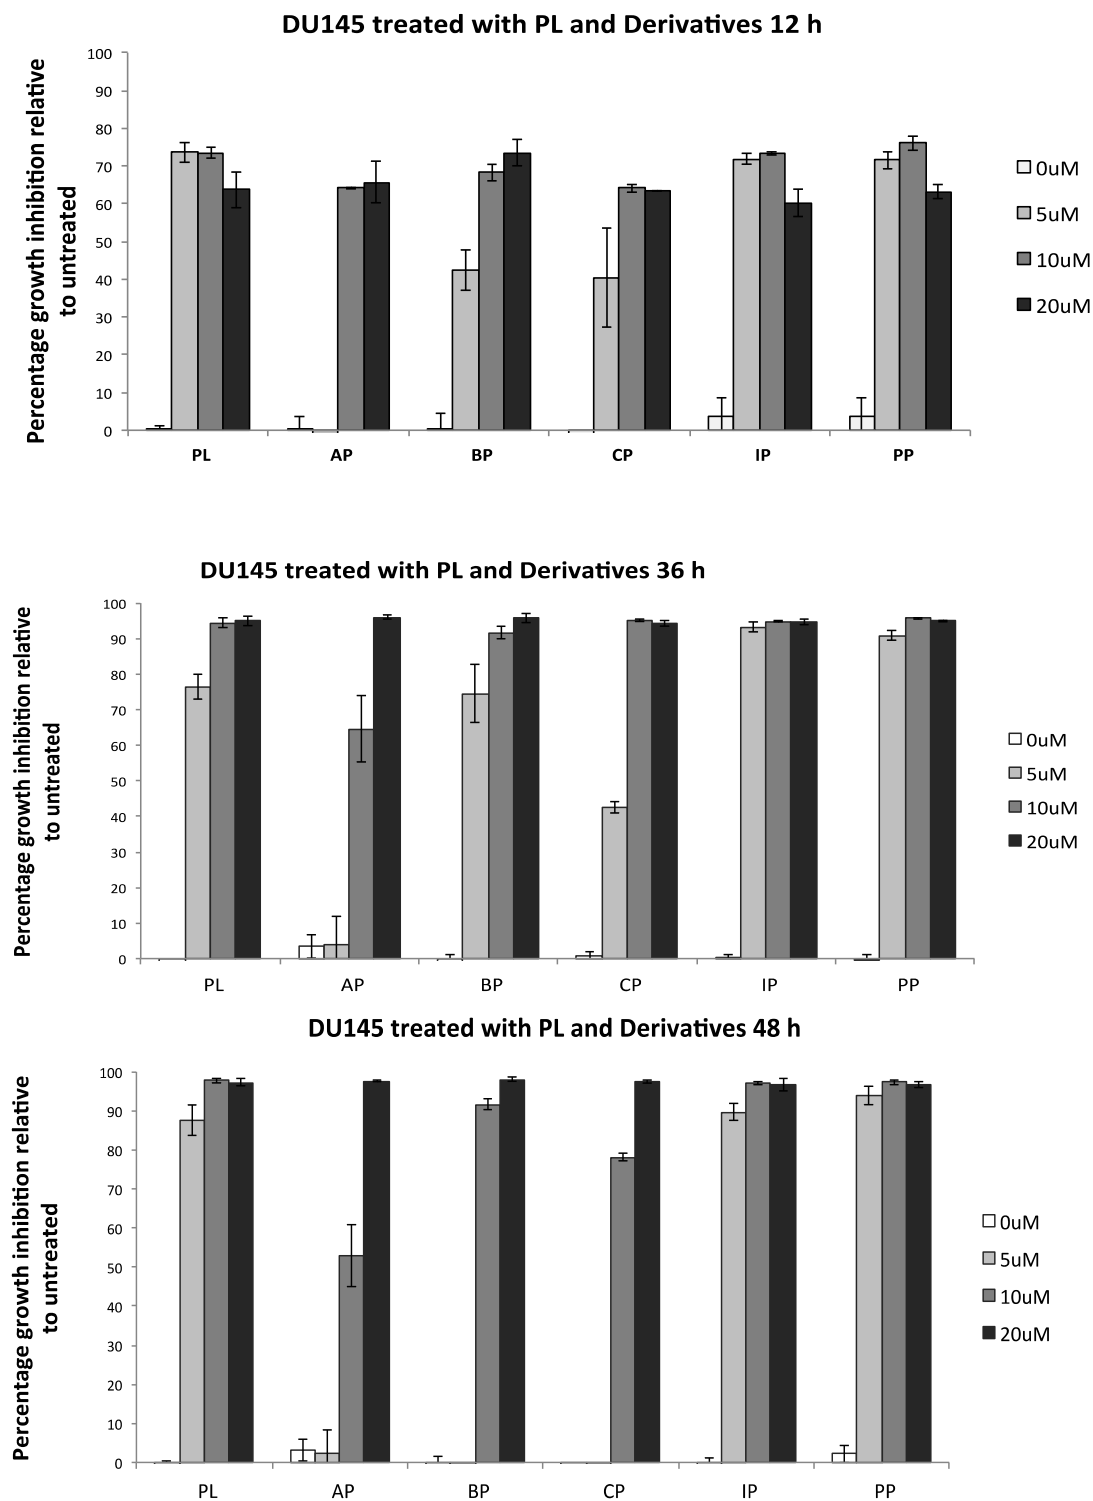

**Supplementary file 2:** PL and derivatives (AP, BP, CP, IP, and PP) induced growth inhibition in cancer and normal cells within 12, 36 and 48 h of treatment (read 0  $\mu$ M as untreated). Growth inhibition was assessed using MTT assay. Data are mean $\pm$ S.D. (n=3). Growth inhibition at 12, 36 and 48 h for (a) BJ cells, (b) MCF-7 cells, (c) BT20 cells, (d) HepG2 cells, (e) DU145 cells and (f) HeLa cells.

(a)

ROS activity in MCF-7 Cells treated with PL and Derivatives for 2 h

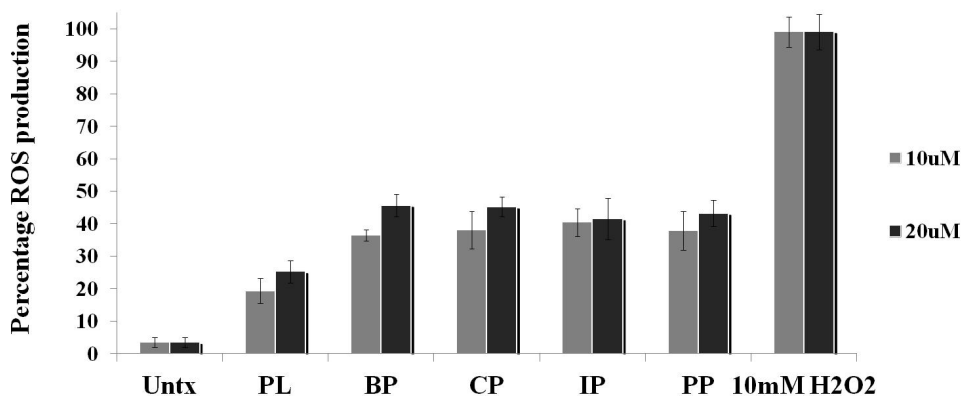

(b)

ROS activity in BT20 treated with PL and Derivatives for 2 h

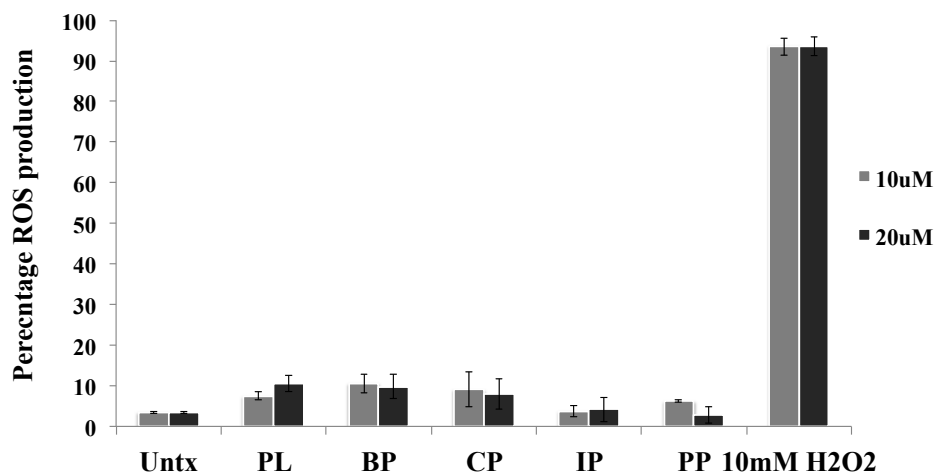

**Supplementary file 3:** PL and derivatives (BP, CP, IP, and PP) induced ROS production in cancer cells, (a) MCF-7 cells and (b) BT20 cells, within 2 h of treatment (read Untx as untreated). ROS production was assessed using DCFDA assay. Data are mean±S.D. (n=3).
